# Supplementary material
Source: Springer Nature journal article supplement (https://www.springermedizin.de/resource/supplementary/12887_2011_548_MOESM6_ESM.pdf/9475412)
Supplement: MOESM6 [file 9475412]

Mean Age = 11.30 years (SD 0.04)

**256** completed  $\geq 1$  x 24 hr recall  
**99** Aboriginal and Torres Strait Islander children  
**157** non-Indigenous children  
**111** boys  
**145** girls

### **EXCLUSIONS**

**4** insufficient numbers of recalls  
**6** missing body weight data  
**31** implausible dietary records (23 under-reporters 8 over-reporters)

### **FINAL PARTICIPANTS**

**215** with 3 x 24 hr food recall data (including 1 x weekend day)  
**82** Aboriginal and Torres Strait Islander children ( **34** boys and **48** girls)  
**133** non-Indigenous children (**59** boys and **74** girls)
